# Supplementary material for: Precise determination of Pb isotope ratios by simple double spike MC-ICP-MS technique without Tl addition
Source: Royal Society of Chemistry journal article supplement (doi:10.1039/b616021b), 2007-01-01
Supplement: figs2.doc [file figs2.doc]

**Fig. S2 Mass discrimination correction for Pb in MC-ICP-MS**

As no Tl correction for mass discrimination correction is employed in this study, investigation on the behavior of mass discrimination in MC-ICP-MS is important. In the Figure, the raw isotope ratio of jPb/206Pb (j=204, 207 and 208) in the NIST 981 measurements without spike is plotted against the mass discrimination correction factor, Fj, which is defined as:

Fj=(Rj/206CORR/Rj/206OBS-1)/Aj (1)

where Rj/206OBS and Rj/206CORR are observed and mass discrimination corrected jPb/206Pb ratios (j=204, 207 and 208) respectively; and Aj is a constant for the mass discrimination correction, which is a function of mass difference in the exponential approximation:24

Aj=mj-m206-(mj-m206)2 / (m206 x 2) (2)

in which the actual masses of m204=203.973, m206=205.974, m207=206.976, m208=207.977 are used.

All raw data form linear lines with good correlation, indicating that the exponential approximation is a suitable mass discrimination correction method. The average of the mass discrimination corrected ratio obtained by DS is shown in the figure as the solid diamond. Thus, it is evident that the DS calculation including mass discrimination correction in this study is properly performed.

**Figure Caption:**  Observed isotope ratios of jPb/206Pb vs. the fractionation factor, Fj.

(a) 204Pb/206Pb vs F204, (b) 207Pb/206Pb vs F207, (c) 208Pb/206Pb vs F208. The open circles are raw data, and the black diamonds are averages of mass discrimination corrected data in Fig. 1, 204Pb/206Pb= 0.059026, 207Pb/206Pb= 0.91483 and 208Pb/206Pb= 2.1674, which are determined by DS method in this study. The line in each figure is a regression line of the raw data with their equations and R2 shown in each figure.
